# Supplementary material for: Electrostatic co-assembly of FePS3 nanosheets and surface functionalized BCN heterostructures for hydrogen evolution reaction
Source: Royal Society of Chemistry journal article supplement (doi:10.1039/d3dt03222a), 2024-01-01
Supplement: d3dt03222a1.pdf [file d3dt03222a1.pdf]

## Electrostatic co-assembly of FePS<sub>3</sub> nanosheets and surface functionalized BCN heterostructure for hydrogen evolution reaction

Abhinandan Patra<sup>a</sup>, K Pramoda<sup>a</sup>, Shridhar Hegde<sup>a</sup>, Aravind K<sup>a</sup>, Kseniia Mosina<sup>b</sup>, Zdenek Sofer<sup>b</sup>, Chandra Sekhar Rout<sup>a\*</sup>

<sup>a</sup>Centre for Nano and Material Sciences, Jain (Deemed-to-be University), Jain Global Campus, Kanakapura Road, Bangalore – 562112, Karnataka, India.

<sup>b</sup>Dept. of Inorganic Chemistry, University of Chemistry and Technology Prague, Technicka 5, 166 28 Prague 6, Czech Republic.

E-mail: Corresponding author: <sup>a\*</sup> [r.chandrasekhar@jainuniversity.ac.in](mailto:r.chandrasekhar@jainuniversity.ac.in);

<sup>a\*</sup> [csrout@gmail.com](mailto:csrout@gmail.com)

Formula used to calculate the electrochemical active surface area (ECSA), roughness factor (Rf), the double layer capacitance (C<sub>dl</sub>), mass activity (MA), specific activity (SA) are given below along with the parameters and their designated symbols.<sup>1-5</sup>

$$1. \text{ ECSA} = \frac{C_{dl}}{C_s}$$

$$2. R_f = \frac{\text{ECSA}}{\text{geometrical area of the electrode}}$$

$$3. \text{ MA} = \frac{j}{m}$$

$$4. \text{ SA} = \frac{j}{m \cdot 10 \cdot S_{BET}}$$

Here,

$C_s$  = specific capacitance 0.04 mF/cm<sup>2</sup> in acidic condition

Geometrical area of the electrode = 0.0706 cm<sup>2</sup>

$j$  = current density in mA/cm<sup>2</sup>

$m$  = mass loading per geometrical active area in mg/cm<sup>2</sup>

$S_{BET}$  = surface area of the catalysts obtained from BET surface area analysis

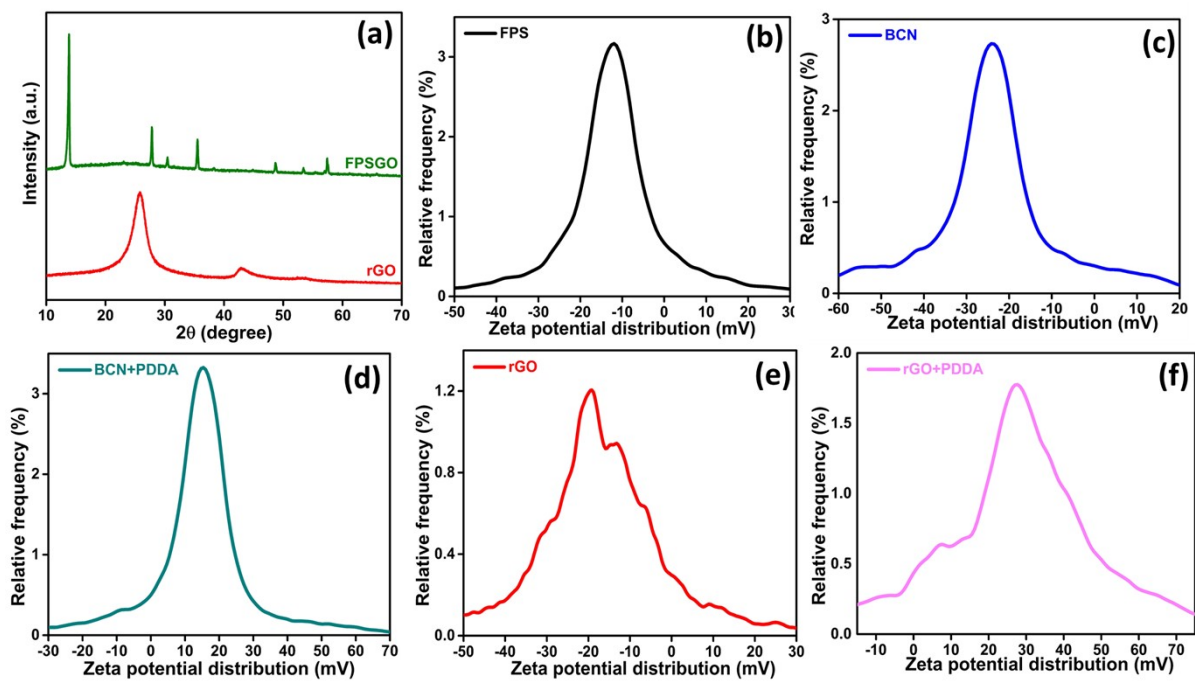

Fig-S1: (a) XRD pattern of rGO and FPSGO and (b) to (f) zeta potential electrokinetic measurements of FPS, BCN, BCN+PDDA, rGO and rGO+PDDA respectively.

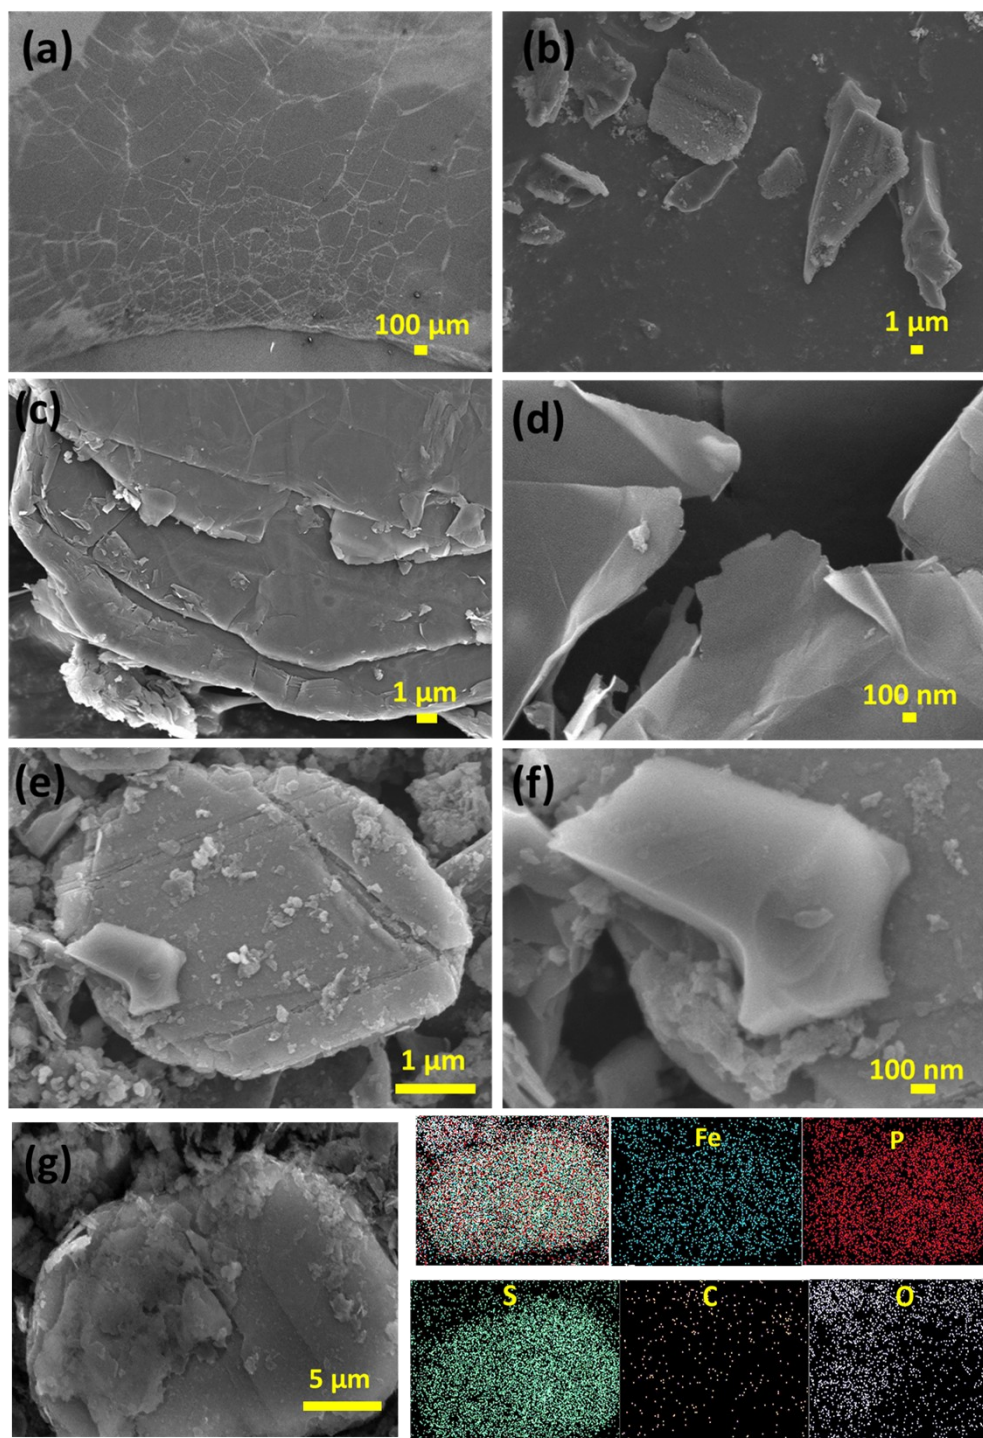

Fig-S2: FESEM images of (a) FPS crystal, (b) BCN nanosheets, (c) and (d) rGO sheets, (e) and (f) FPSGO and (g) EDAX mapping of FPSGO with individual elements.

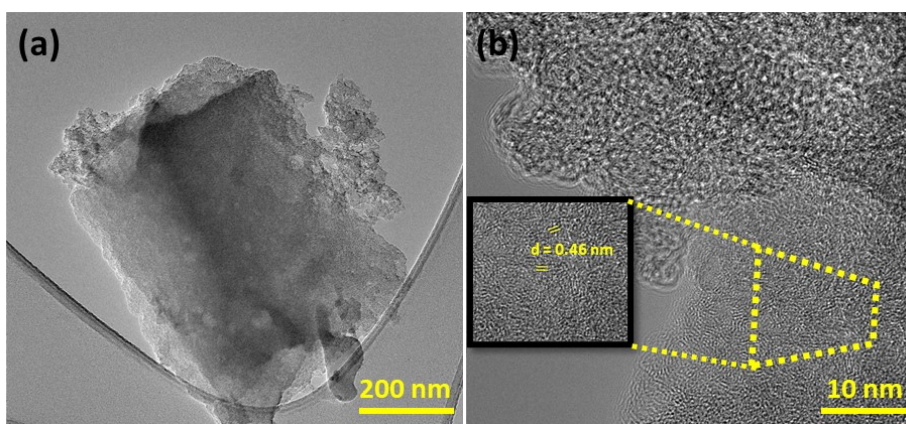

Fig-S3: (a) TEM and (b) HRTEM images of BCN.

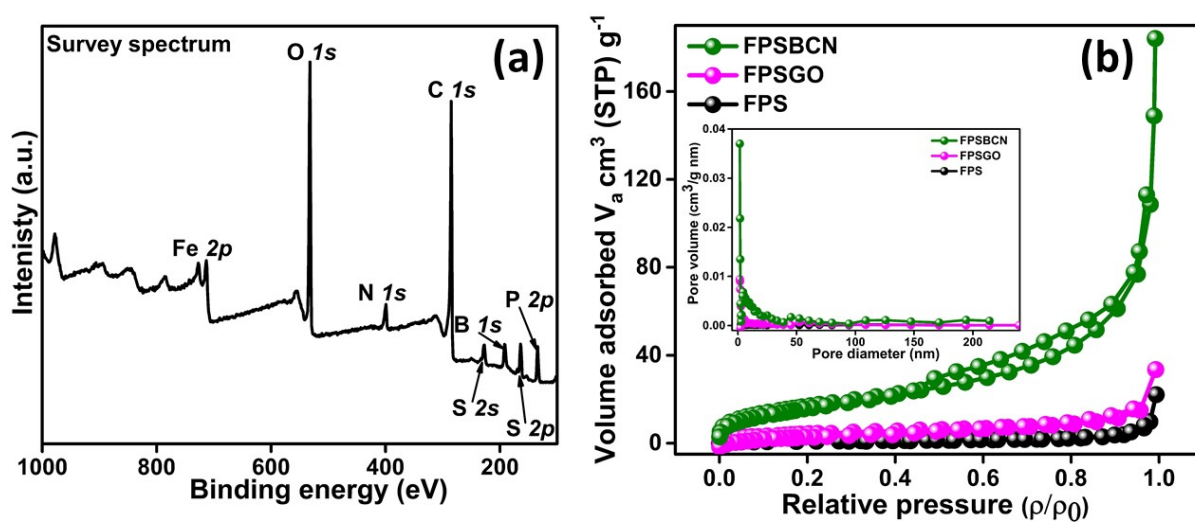

Fig-S4: (a) Survey spectra of FPSBCN and (b) BET surface area analysis of FPSBCN, FPSGO and FPS with inset image showing the graph of pore size distribution.



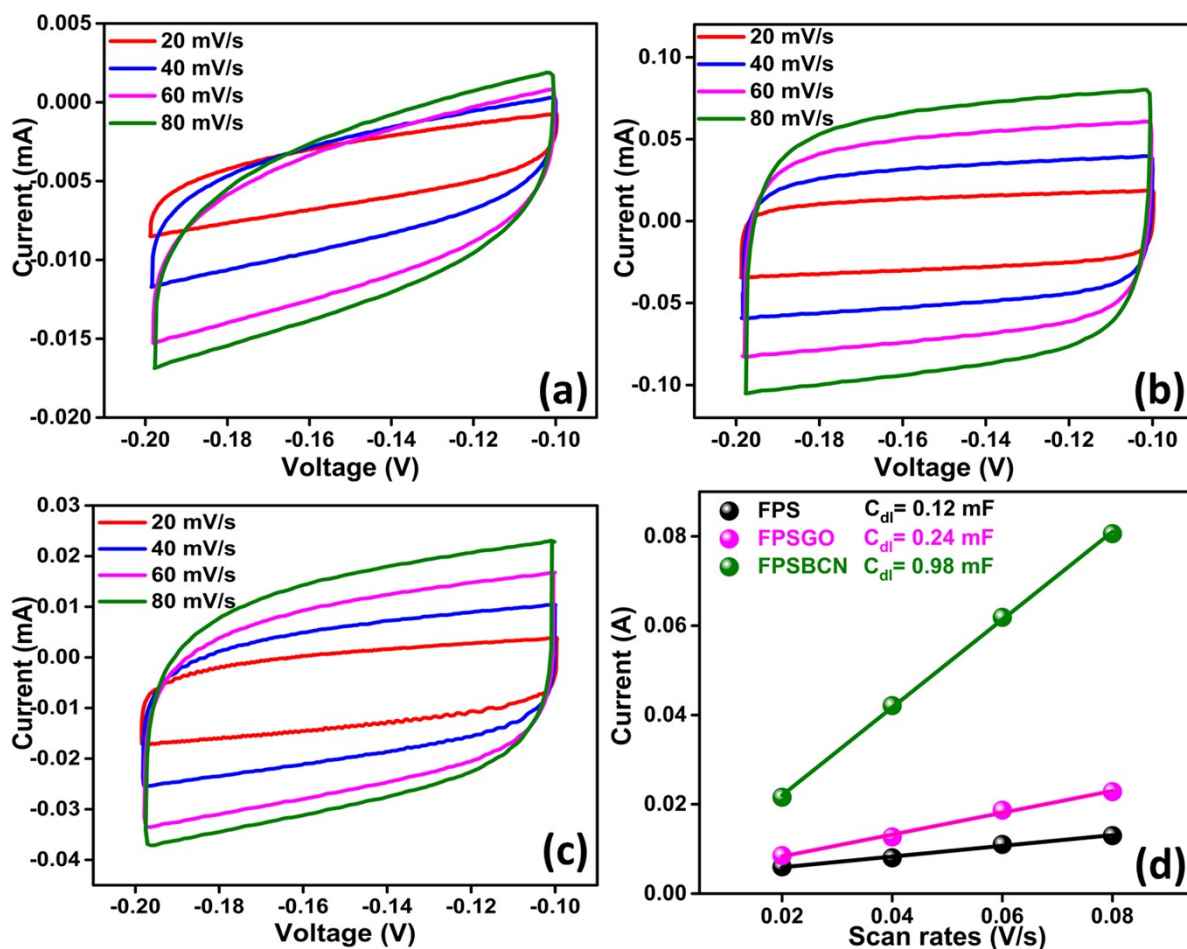

Fig-S5: CV measurements in -0.2 to -0.1 V; (a) FPS, (b) FPSGO, (c) FPSBCN and (d) evaluation of double layer capacitance from variation of current with scan rates.

| Material code | Value of Zeta potential (mV) |
|---------------|------------------------------|
| FPS           | -12.8                        |
| BCN           | -22.6                        |
| BCN+PDDA      | 15.9                         |
| rGO           | -14.2                        |
| FPSGO         | 24.5                         |

Table-ST1: Zeta potential values of the catalysts in tabular form.

| Material code | Surface area (m <sup>2</sup> /g) | Pore volume (cm <sup>3</sup> /g) | Pore diameter (nm) |
|---------------|----------------------------------|----------------------------------|--------------------|
| FPS           | 3                                | 0.029                            | 35.64              |
| FPSGO         | 18                               | 0.049                            | 11.23              |
| FPSBCN        | 63                               | 0.25                             | 15.40              |

Table-ST2: BET surface area, pore volume and mean pore diameter of the catalysts in tabular form.

| Material code | $C_{dl}$ (mF) | ECSA (cm <sup>2</sup> ) | $R_f$  | Mass activity (A/g) | Specific activity (mA/cm <sup>2</sup> ) |
|---------------|---------------|-------------------------|--------|---------------------|-----------------------------------------|
| FPS           | 0.12          | 3                       | 42.49  | 0.63                | 0.02                                    |
| FPSGO         | 0.24          | 6                       | 84.98  | 4.28                | 0.023                                   |
| FPSBCN        | 0.98          | 24.5                    | 347.02 | 119.29              | 0.189                                   |

Table ST3:  $C_{dl}$ , ECSA,  $R_f$ , mass activity and specific activity of the catalysts in tabular form

| Serial No. | Material code                       | Electrolyte                              | Overpotential (mV) | Tafel (mV/dec) | Reference        |
|------------|-------------------------------------|------------------------------------------|--------------------|----------------|------------------|
| 1          | B,N:Mo <sub>2</sub> C@BCN           | 1 M KOH                                  | 100                | 62             | 6                |
| 2          | BCN nanotube                        | 0.5 M H <sub>2</sub> SO <sub>4</sub>     | 216                | 92             | 7                |
| 3          | CoS <sub>2</sub> @BCN               | 1 M KOH                                  | 376                | 130            | 8                |
| 4          | FePS <sub>3</sub> nanosheets        | 0.5 M H <sub>2</sub> SO <sub>4</sub>     | 139                | 94             | 9                |
| 5          | Co-FePS <sub>3</sub> nanosheets     | 1 M KOH                                  | 170                | 80             | 10               |
| 6          | N-FePS <sub>3</sub> nanosheets      | 1 M KOH                                  | 267                | 163            | 11               |
| 7          | MoS <sub>2</sub> @FePS <sub>3</sub> | 0.5 M H <sub>2</sub> SO <sub>4</sub>     | 127                | 107            | 12               |
| 8          | Cu-BCN composite                    | 0.5 M H <sub>2</sub> SO <sub>4</sub>     | 125                | 114.5          | 13               |
| 9          | $\beta$ -Mo <sub>2</sub> C@BCN      | 0.5 M H <sub>2</sub> SO <sub>4</sub>     | 140                | 103            | 14               |
| 10         | FeCoMnNi-MOF                        | 0.5 M H <sub>2</sub> SO <sub>4</sub>     | 108                | 73             | 15               |
| 11         | Co-MOF                              | 0.5 M H <sub>2</sub> SO <sub>4</sub>     | 44                 | 45             | 16               |
| 12         | Polyoxometalate                     | 1 M KOH                                  | 131                | 51             | 17               |
| 13         | Ni and Co-MOF                       | 0.5 M H <sub>2</sub> SO <sub>4</sub>     | 350                | 60             | 18               |
| <b>10</b>  | <b>FePS<sub>3</sub>@BCN</b>         | <b>0.5 M H<sub>2</sub>SO<sub>4</sub></b> | <b>186</b>         | <b>41</b>      | <b>This work</b> |

Table-ST4: Comparison table of present catalysts with recent literature

## References

- 1  
A. Alinezhad, L. Gloag, T. M. Benedetti, S. Cheong, R. F. Webster, M. Roelsgaard, B. B. Iversen, W. Schuhmann, J. J. Gooding and R. D. Tilley, *Journal of the American Chemical Society*, 2019, **141**, 16202–16207.
- 2  
A. Patra, R. Samal and C. S. Rout, *Catalysis Today*, DOI:<https://doi.org/10.1016/j.cattod.2022.07.021>.
- 3  
L. Wu and J. P. Hofmann, *ACS Energy Letters*, 2021, **6**, 2619–2625.

4

Y. Shi, D. Zhang, H. Miao, X. Wu, Z. Wang, T. Zhan, J. Lai and L. Wang, *Science China Chemistry*, 2022, **65**, 1829–1837.

5

J. Zhang, L. Zhao, A. Liu, X. Li, H. Wu and C. Lu, *Electrochimica Acta*, 2015, **182**, 652–658.

6

M. A. R. Anjum, M. H. Lee and J. S. Lee, *ACS Catalysis*, 2018, **8**, 8296–8305.

7

H. Tabassum, R. Zou, A. Mahmood, Z. Liang and S. Guo, *Journal of Materials Chemistry A*, 2016, **4**, 16469–16475.

8

P. Borthakur, P. K. Boruah, M. R. Das, M. M. Ibrahim, T. Altalhi, H. S. El-Sheshtawy, S. Szunerits, R. Boukherroub and M. A. Amin, *ACS Applied Energy Materials*, 2021, **4**, 1269–1285.

9

Z. Yu, J. Peng, Y. Liu, W. Liu, H. Liu and Y. Guo, *Journal of Materials Chemistry A*, 2019, **7**, 13928–13934.

10

S. Wang, B. Xiao, S. Shen, K. Song, Z. Lin, Z. Wang, Y. Chen and W. Zhong, *Nanoscale*, 2020, **12**, 14459–14464.

11

H. Zhang, Y. Qiu, S. Zhang, Q. Liu, J. Luo and X. Liu, *Ionics*, 2022, **28**, 3927–3934.

12

H. Huang, J. Song, D. Yu, Y. Hao, Y. Wang and S. Peng, *Applied Surface Science*, 2020, **525**, 146623.

13

M. M. Hasan, G. E. Khedr, F. Zakaria and N. K. Allam, *ACS Applied Energy Materials*, 2022, **5**, 9692–9701.

14

M. A. R. Anjum, M. H. Lee and J. S. Lee, *Journal of Materials Chemistry A*, 2017, **5**, 13122–13129.

15

M. Zhang, W. Xu, T. Li, H. Zhu and Y. Zheng, *Inorganic Chemistry*, 2020, **59**, 15467–15477.

16

Y.-P. Wu, W. Zhou, J. Zhao, W.-W. Dong, Y.-Q. Lan, D. Li, C. Sun and X. Bu, *Angewandte Chemie*, 2017, **56**, 13001–13005.

17

Y. Zheng and X. Xu, *ACS Applied Materials & Interfaces*, 2020, **12**, 53739–53748.

18

V. V. Khrizanforova, R. P. Shekurov, Vasili Miluykov, Mikhail Khrizanforov, V. Bon, S. Kaskel, A. T. Gubaidullin, O. G. Sinyashin and Y. H. Budnikova, *Dalton Transactions*, 2020, **49**, 2794–2802.
